# Supplementary material for: Optical frequency metrology in the bending modes region
Source: Springer Nature journal article supplement (doi:10.1038/s42005-020-00441-y), 2020-10-06
Supplement: MOESM1 [file 42005_2020_441_MOESM1_ESM.pdf]

## SUPPLEMENTARY MATERIAL

### Optical frequency metrology in the bending modes region

M. Lamperti, R. Gotti, D. Gatti, M. K. Shakfa, E. Cané, F. Tamassia, P. Schunemann, P. Laporta, A. Farooq, and M. Marangoni

#### Supplementary Figures

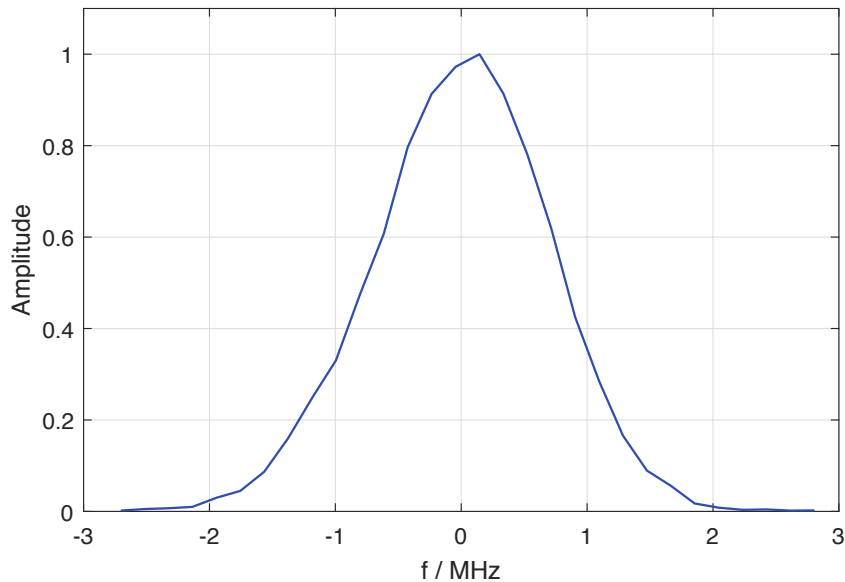

**Supplementary Figure 1 | Beat note spectrum between quantum cascade laser and comb.** Obtained as a histogram of the beat note barycentre frequencies measured by the acquisition board over subsequent time windows of 10  $\mu$ s. The relatively large width of 1.6 MHz could be shrunk to the sub-MHz level by the use of a less noisy current driver<sup>1,2</sup>

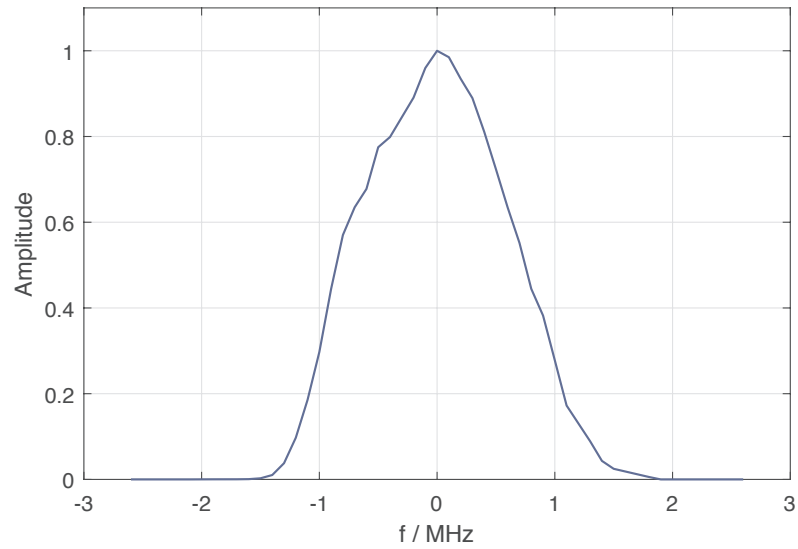

**Supplementary Figure 2 | Beat note spectrum between CO<sub>2</sub> laser and comb.** Obtained as a histogram of the beat-note barycentres measured by the acquisition board over subsequent time windows of 10  $\mu$ s. The slight asymmetry derives from the pulsed operation of the laser. A significant decrease of the linewidth, down to below 100 kHz, could be obtained by recurring to a cw emission regime.

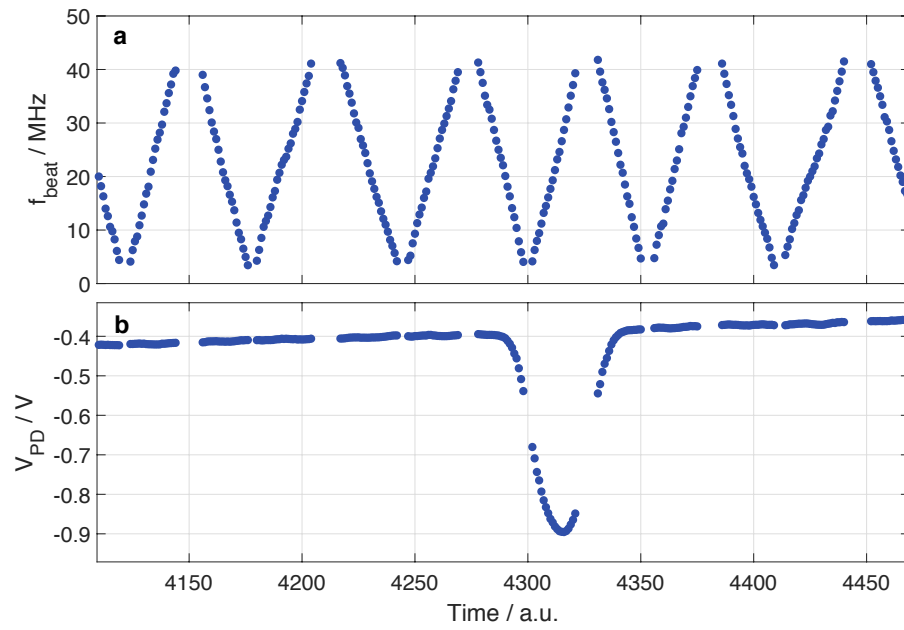

**Supplementary Figure 3 | Raw measurement data for a single CO<sub>2</sub> line. a** Time behaviour of the beat note frequency between quantum cascade laser and comb and **b** of the photodetector signal.

## Supplementary tables

| Band                     | Line  | Obs / cm <sup>-1</sup> | HITRAN/ cm <sup>-1</sup> | Obs-HITRAN / 10 <sup>-6</sup> cm <sup>-1</sup> | <i>N</i> |
|--------------------------|-------|------------------------|--------------------------|------------------------------------------------|----------|
| $\nu_2$                  | R(10) | 676.01943603(66)       | 676.019431               | 5.0                                            | 25       |
| $\nu_2$                  | R(12) | 677.6008247(13)        | 677.600821               | 3.8                                            | 6        |
| $\nu_2$                  | R(14) | 679.18538721(70)       | 679.185387               | 0.2                                            | 27       |
| $\nu_2$                  | R(16) | 680.7731066(15)        | 680.773099               | 7.6                                            | 2        |
| $\nu_2$                  | R(18) | 682.3639287(18)        | 682.363927               | 1.7                                            | 2        |
| $\nu_2$                  | R(20) | 683.9578497(10)        | 683.957836               | 13.8                                           | 25       |
| $\nu_2$                  | R(22) | 685.5548060(34)        | 685.554794               | 12.0                                           | 5        |
| $\nu_2$                  | R(24) | 687.1547798(30)        | 687.154767               | 12.9                                           | 2        |
| $\nu_2$                  | R(26) | 688.7577330(62)        | 688.757719               | 14.1                                           | 1        |
| $\nu_1 \leftarrow \nu_2$ | Q(36) | 719.4226506(45)        | 719.422625               | 25.7                                           | 2        |
| $\nu_1 \leftarrow \nu_2$ | Q(34) | 719.5662865(32)        | 719.566271               | 15.5                                           | 2        |
| $\nu_1 \leftarrow \nu_2$ | Q(32) | 719.7026444(29)        | 719.702628               | 16.5                                           | 2        |
| $\nu_1 \leftarrow \nu_2$ | Q(30) | 719.8315747(41)        | 719.831557               | 17.7                                           | 2        |
| $\nu_1 \leftarrow \nu_2$ | Q(28) | 719.9529553(39)        | 719.952922               | 33.4                                           | 2        |
| $\nu_1 \leftarrow \nu_2$ | Q(26) | 720.0666311(55)        | 720.066601               | 30.2                                           | 2        |
| $\nu_1 \leftarrow \nu_2$ | Q(24) | 720.1724819(58)        | 720.172478               | 3.9                                            | 2        |
| $\nu_1 \leftarrow \nu_2$ | Q(22) | 720.2704506(72)        | 720.270446               | 4.6                                            | 2        |
| $\nu_1 \leftarrow \nu_2$ | Q(18) | 720.4422813(75)        | 720.442276               | 5.3                                            | 2        |
| $\nu_1 \leftarrow \nu_2$ | Q(14) | 720.5814236(50)        | 720.581411               | 12.6                                           | 2        |
| $\nu_1 \leftarrow \nu_2$ | Q(12) | 720.6385565(71)        | 720.638544               | 12.6                                           | 2        |
| $\nu_1 \leftarrow \nu_2$ | Q(8)  | 720.7276548(51)        | 720.727664               | -9.2                                           | 2        |
| $\nu_1 \leftarrow \nu_2$ | Q(6)  | 720.7595686(35)        | 720.759565               | 3.7                                            | 2        |
| $\nu_1 \leftarrow \nu_2$ | Q(4)  | 720.7829825(26)        | 720.782984               | -1.5                                           | 2        |
| $\nu_1 \leftarrow \nu_2$ | Q(2)  | 720.7979103(34)        | 720.797897               | 13.4                                           | 2        |

**Supplementary Table 1 | Carbon dioxide line list.** Observed and calculated wavenumbers of the transitions assigned to  $\nu_2$  and  $\nu_1 \leftarrow \nu_2$  for CO<sub>2</sub>, ordered for increasing energy. The heading *N* indicates the number of independent spectral measurements used to infer the observed line centre frequency.

## Supplementary Notes

### Supplementary Note 1 | Characterization of the difference frequency generation linewidth

The linewidth of the difference frequency generation (DFG) laser source has been estimated from the measured beat notes of quantum cascade laser (QCL) and CO<sub>2</sub> laser with the comb (Supplementary Fig. 1 and 2, respectively). These have an almost Gaussian-like shape, which justifies a quadrature sum of their widths to have a reliable estimation of the DFG linewidth. The contribution of the comb linewidth ( $\sim 100$  kHz) to the beat notes ( $\sim 1.5$  MHz) is negligible.

For both lasers, the beat note has been measured via the  $100 \text{ MS s}^{-1}$  digital acquisition board (DAQ) used for spectral acquisition, by subdividing the beat note samples in groups of 1024 points and calculating the barycentre of the electrical spectrum for each group via fast Fourier transform (FFT). This is equivalent to repeatedly measuring the average laser frequency (as compared to the comb) over a measurement time of  $10 \mu\text{s}$  (1024 points at every 10 ns). The distribution of these frequencies is shown in Supplementary Fig. 1 and 2 for QCL and CO<sub>2</sub> laser, respectively. The full widths at half maximum (FWHM) of these distributions, 1.6 and 1.5 MHz, respectively, provide an estimated value of their linewidths. As both distributions have a Gaussian line-shape, we applied the quadrature sum of their widths to infer the width of their convolution, which gives the DFG linewidth and thus the resolution of the spectrometer.

### Supplementary References

1. Tombez, L. *et al.* Frequency noise of free-running  $4.6 \mu\text{m}$  distributed feedback quantum cascade lasers near room temperature. *Opt. Lett.* **36**, 3109-3111 (2011).
2. Mills, A. A. *et al.* Coherent phase lock of a  $9 \mu\text{m}$  quantum cascade laser to a  $2 \mu\text{m}$  thulium optical frequency comb. *Opt. Lett.* **37**, 4083-4085 (2012).
